# Supplementary material for: Establishment of a communication environment supporting low-health literacy in the Hungarian community pharmacies: the introduction of a methodological recommendation: a before–after study
Source: HighWire-hosted journal article supplement (doi:10.1136/bmjopen-2020-039603), 2020-12-01
Supplement: bmjopen-2020-039603supp001_data_supplement.pdf [file bmjopen-2020-039603supp001_data_supplement.pdf]

*Annex 1: Communication checklist – text summary (English transcription)*

**HEALTH LITERACY COMMUNICATION - CHECKLIST**

**Use simple language.**

- Avoid technical terms, use their common synonyms.
- If you still need to use a term, explain the meaning.

**Highlight the most important information.**

- *Verbally: use emotional accentuation (e.g. "It's very important to know that ...").*
- *Writing: use underlining or colored text in the medication box or the patient leaflet.*

**When describing the dosage of medications, give the total daily amount divided into periods of the day.**

- For example: "Take two pills daily: one in the morning and one in the evening."  
Avoid the wording: "This medicine should be taken in 2x1 doses."

**Give only the most necessary information verbally.**

- The capacity of short-term memory is limited, so you should not have more than four verbal messages in one conversation.

**Recommend a written leaflet or website.**

- Provide a leaflet with more information about the disease and the therapy.
- Ask if the patient has internet access and if so, give them a list of professionally credible websites that can be recommended to them.

**Offer your help in the preparation of the medicine.**

- If the medicine (e.g. a suspension) is to be prepared by the patient him/herself, offer your help, and prepare it prepared in the pharmacy.

**Show the patient how to use the purchased equipment.**

- If the patient buys a device (e.g. blood pressure monitor, blood glucose meter, inhaler, etc.), offer to show their use.

**Encourage the patient to ask questions.**

- For example: "If you have any questions about this medicine, I would be happy to answer them."  
Avoid the "Do you have a question?" wording, because the answer is usually denial.
