# Supplementary material for: Establishment of a communication environment supporting low-health literacy in the Hungarian community pharmacies: the introduction of a methodological recommendation: a before–after study
Source: HighWire-hosted journal article supplement (doi:10.1136/bmjopen-2020-039603), 2020-12-01
Supplement: bmjopen-2020-039603supp002_data_supplement.pdf [file bmjopen-2020-039603supp002_data_supplement.pdf]

*Annex 2: „Ask your pharmacist!” poster – text summary (English transcription)*

**ASK YOUR PHARMACIST!**

**To use your medication successfully, it is important that you know the answers to the following questions:**

- What is the name of the medicine and what does it do?
- How often and how much should I take?
- When, how, and under what circumstances should I take it? Do I have to take it with or without food?
- Are there any foods or beverages (alcoholic beverages) to avoid while taking?
- How do I feel if the drug works and how if not?
- How long should I take? Can I quit earlier if I am better?
- What are the most common side effects? What should I do if I experience side effects?
- What should I do if I forget to take it once or more?
- Can I take other medicines at the same time?
- Is there an over-the-counter medicine that I cannot take with this medicine?
- Can I drive a car? Can I sunbathe while taking medication?
- Does the effect of my medicine change if I use it constantly?
- What happens if I do not use the medicine?
- How should I store my medicine?

**Always tell your doctor or pharmacist:**

- About prescription and over-the-counter medicines, you take.
- Allergies, side effects associated with your medication.
- If you are pregnant or breast-feeding.

If you have any problems with your current medication (cannot take your medication properly).
