# Supplementary material for: Establishment of a communication environment supporting low-health literacy in the Hungarian community pharmacies: the introduction of a methodological recommendation: a before–after study
Source: HighWire-hosted journal article supplement (doi:10.1136/bmjopen-2020-039603), 2020-12-01
Supplement: bmjopen-2020-039603supp004_data_supplement.pdf [file bmjopen-2020-039603supp004_data_supplement.pdf]

*Annex 4: Patient questionnaire (the number next to each answer represents the point value of the given answer; this was not indicated in the patient questionnaire) (English transcription)*

|                                                                                                                                                          |                                                                                                                                                                          |                                |                                |                                          |                                 |
|----------------------------------------------------------------------------------------------------------------------------------------------------------|--------------------------------------------------------------------------------------------------------------------------------------------------------------------------|--------------------------------|--------------------------------|------------------------------------------|---------------------------------|
| <b>PHARMACY QUESTIONNAIRE FOR PATIENTS</b>                                                                                                               |                                                                                                                                                                          |                                |                                | Date:      (day)      (month)      2017. |                                 |
| <b>The purpose of completing this questionnaire is to survey all pharmacy services that help patients achieve more effective and safer drug therapy.</b> |                                                                                                                                                                          |                                |                                |                                          |                                 |
| <i>Please circle your answer!</i>                                                                                                                        |                                                                                                                                                                          |                                |                                |                                          |                                 |
| <b>Sex</b>                                                                                                                                               | Male                                                                                                                                                                     | Female                         |                                |                                          |                                 |
| <b>Age</b>                                                                                                                                               | 18-25                                                                                                                                                                    | 26-40                          | 41-65                          | 65 -                                     |                                 |
| <b>Marital status</b>                                                                                                                                    | Single                                                                                                                                                                   | Married/long-term relationship | Widowed                        | Other                                    |                                 |
| <b>Education attainment</b>                                                                                                                              | Primary school                                                                                                                                                           | Vocational school              | Baccalaureate                  | University                               |                                 |
| <b>Type of settlement</b>                                                                                                                                | Village                                                                                                                                                                  | Other city                     | County town                    | Capital                                  |                                 |
| <b>1</b>                                                                                                                                                 | <b>Did the pharmacist or pharmacy technician use complicated terms or expressions during the consultation?</b>                                                           | Yes (1)                        | No (4)                         | I don't know (0)                         |                                 |
| <b>2</b>                                                                                                                                                 | <b>Did the pharmacist or pharmacy technician encourage you to ask questions during the consultation?</b>                                                                 | Yes (4)                        | No (1)                         | I don't know (0)                         |                                 |
| <b>3</b>                                                                                                                                                 | <b>Did your pharmacist or pharmacy technician emphasize the important information orally, with written help or graphics?</b>                                             | Yes (4)                        | No (1)                         | I don't know (0)                         |                                 |
| <b>4</b>                                                                                                                                                 | <b>How easy or difficult was it for you to understand the instructions given by your pharmacist or pharmacy technician on how to take/use the prescribed medication?</b> | Very difficult (1)             | Rather difficult (2)           | Rather easy (3)                          | Very easy (4)                   |
| <b>5</b>                                                                                                                                                 | <b>How much do you feel you know all the important information about your medicines?</b>                                                                                 | Not at all (1)                 | I have a lack of knowledge (2) | I have medium knowledge (0)              | I have sufficient knowledge (3) |
| <b>6</b>                                                                                                                                                 | <b>How do you see your state of health?</b>                                                                                                                              | Very good (4)                  | Good (3)                       | Acceptable (0)                           | Bad (2)                         |
|                                                                                                                                                          |                                                                                                                                                                          |                                |                                |                                          | Very bad (1)                    |
